# Supplementary material for: Polycyclic aromatic hydrocarbon in urban soils of an Eastern European megalopolis: distribution, source identification and cancer risk evaluation
Source: Copernicus journal article supplement (doi:10.5194/se-9-669-2018), 2018-05-23
Supplement: Supplementary file 1 [file se-9-669-2018-supplement.zip]

Archive with 4 entries (3 files):
- Supplementary/
- Supplementary/Tabe-S3.pdf.pdf
- Supplementary/Table-S1-2.pdf
- se-9-669-2018-supplement-title-page.pdf
