# Supplementary material for: Polycyclic aromatic hydrocarbon in urban soils of an Eastern European megalopolis: distribution, source identification and cancer risk evaluation
Source: Copernicus journal article supplement (doi:10.5194/se-9-669-2018), 2018-05-23
Supplement: Supplementary file 1 [file se-9-669-2018-supplement.zip › se-9-669-2018-supplement-title-page.pdf]

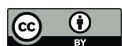

## *Supplement of*

# **Polycyclic aromatic hydrocarbon in urban soils of an Eastern European megalopolis: distribution, source identification and cancer risk evaluation**

**George Shamilishvily et al.**

*Correspondence to:* George Shamilishvily ([george199207@gmail.com](mailto:george199207@gmail.com))

- [se-9-669-2018-supplement-title-page.pdf](#)
- Supplementary
  - [Tabe-S3.pdf.pdf](#)
  - [Table-S1-2.pdf](#)

The copyright of individual parts of the supplement might differ from the CC BY 3.0 License.
