# Supplementary material for: Polycyclic aromatic hydrocarbon in urban soils of an Eastern European megalopolis: distribution, source identification and cancer risk evaluation
Source: Copernicus journal article supplement (doi:10.5194/se-9-669-2018), 2018-05-23
Supplement: Supplementary file 1 [file se-9-669-2018-supplement.zip › Supplementary/Tabe-S3.pdf.pdf]

# Polycyclic aromatic hydrocarbon in urban soils of the Eastern European megalopolis: distribution, source identification and cancer risk evaluation

Shamilishvily G<sup>1</sup>, Abakumov E<sup>1</sup>, Gabov D<sup>2</sup>

<sup>1</sup>St. Petersburg State University, Dept. of Applied Ecology, St. Petersburg, Russia

<sup>2</sup>Komi Biological Institute of the Russian Academy of Sciences, Syktyvkar, Russia

e-mail: [george199207@gmail.com](mailto:george199207@gmail.com)

**Table S3.** Information on the sampling plots

| Functional zone | Primorskiy district |                          |                          |                                      |                                                     |                                  |                                    |                                                                                                                                                                                                                                                                                                                                                                                                                                                          |
|-----------------|---------------------|--------------------------|--------------------------|--------------------------------------|-----------------------------------------------------|----------------------------------|------------------------------------|----------------------------------------------------------------------------------------------------------------------------------------------------------------------------------------------------------------------------------------------------------------------------------------------------------------------------------------------------------------------------------------------------------------------------------------------------------|
|                 | Sampling plot #     | Address                  | GPS                      | Sampling plot square, m <sup>2</sup> | Object of study                                     | Proximity to nearest highways, m | Proximity to nearest industries, m | Relief, landscape, vegetation type, population density, nearest industries and highways, traffic, dominating wind directions                                                                                                                                                                                                                                                                                                                             |
| Recreational    | 1                   | Primorskiy prospect, 159 | 59.985825 N, 30.191534 E | 25                                   | The park of the 300th anniversary of St. Petersburg | 190                              | 690                                | Flat marine plain with altitudes below 15 m above the sea level, bulk territories with lawn constructions with presence of ruderal species; Population density - 4952 people per km <sup>2</sup> ; Dominating wind directions – south and south-western, nearest industries – varnish and paint plant “Kronos”, scientific and production complex "Abrasive and grinding"; Nearest highways – Primorskiy prospect, Turistskaya street (average traffic). |
|                 | 2                   | Primorskiy prospect, 157 | 59.985040 N, 30.193958 E | 25                                   | The park of the 300th anniversary of St. Petersburg | 190                              | 840                                |                                                                                                                                                                                                                                                                                                                                                                                                                                                          |
|                 | 3                   | Primorskiy prospect, 74B | 59.983459 N, 30.202799 E | 25                                   | The park of the 300th anniversary of St. Petersburg | 200                              | 860                                |                                                                                                                                                                                                                                                                                                                                                                                                                                                          |
|                 | 4                   | Primorskiy prospect, 147 | 59.983395 N, 30.205910 E | 25                                   | The park of the 300th anniversary of St. Petersburg | 200                              | 1100                               |                                                                                                                                                                                                                                                                                                                                                                                                                                                          |
|                 | 5                   | Primorskiy prospect, 72  | 59.981858 N, 30.212188 E | 25                                   | Territory – North Seaside part                      | 160                              | 1150                               |                                                                                                                                                                                                                                                                                                                                                                                                                                                          |
| Residential     | 6                   | Yahtennaya street, 22.   | 59.996546 N, 30.219670 E | 25                                   | Residential area on Yahtennaya street               | 45                               | 530                                | Flat plain with altitudes below 20 m above the sea level, ruderal vegetation; Population density - 4952 people per km <sup>2</sup> ; Dominating wind directions – south and south-western, nearest industries – varnish and paint plant “Kronos”, scientific and production complex "Abrasive and grinding"; Nearest highways – Yahtennaya street, Primorskiy prospect, Opticov street (average traffic).                                                |
|                 | 7                   | Yahtennaya street, 22A.  | 59.996971 N, 30.219809 E | 25                                   | Residential area on Yahtennaya street               | 45                               | 630                                |                                                                                                                                                                                                                                                                                                                                                                                                                                                          |
|                 | 8                   | Yahtennaya street, 22B.  | 59.997401 N, 30.220066 E | 25                                   | Residential area on Yahtennaya street               | 45                               | 730                                |                                                                                                                                                                                                                                                                                                                                                                                                                                                          |
|                 | 9                   | Yahtennaya street, 24.   | 59.997825 N, 30.220335 E | 25                                   | Residential area on Yahtennaya street               | 45                               | 830                                |                                                                                                                                                                                                                                                                                                                                                                                                                                                          |
| Industrial      | 10                  | Avtobusnaya street, 8.   | 60.029040 N, 30.260285 E | 25                                   | Vicinity of the Bus depot №2                        | 30                               | 50                                 | Flat plain with altitudes below 35 m above the sea level, fragmentized ruderal vegetation; Population density - 4952 people per km <sup>2</sup> ; Dominating wind directions – south and south-western, nearest industries – abrasive plant “Il’ich”, Bus depot #2; Nearest highways – Avtobusnaya street, Novo-Nikitinskaya street, Parashutnaya street (average traffic).                                                                              |
|                 | 11                  | Avtobusnaya street, 9.   | 60.029577 N, 30.260896 E | 25                                   | Vicinity of the Bus depot №2                        | 30                               | 50                                 |                                                                                                                                                                                                                                                                                                                                                                                                                                                          |
|                 | 12                  | Avtobusnaya street, 12A. | 60.028568 N, 30.259555 E | 25                                   | Vicinity of the Bus depot №2                        | 30                               | 50                                 |                                                                                                                                                                                                                                                                                                                                                                                                                                                          |
|                 | 13                  | Avtobusnaya street, 8B.  | 60.028568 N, 30.259555 E | 25                                   | Vicinity of the Bus depot №2                        | 50                               | 100                                |                                                                                                                                                                                                                                                                                                                                                                                                                                                          |

| Functional zone | Vasileostrovskiy district |                                    |                           |                                      |                                              |                                  |                                    |                                                                                                                                                                                                                                                                                                                                                                                                         |
|-----------------|---------------------------|------------------------------------|---------------------------|--------------------------------------|----------------------------------------------|----------------------------------|------------------------------------|---------------------------------------------------------------------------------------------------------------------------------------------------------------------------------------------------------------------------------------------------------------------------------------------------------------------------------------------------------------------------------------------------------|
|                 | Sampling plot #           | Address                            | GPS                       | Sampling plot square, m <sup>2</sup> | Object of study                              | Proximity to nearest highways, m | Proximity to nearest industries, m | Relief, landscape, vegetation type, population density, nearest industries and highways, traffic, dominating wind directions                                                                                                                                                                                                                                                                            |
| Recreational    | 14                        | 2d Line of Vasilyevskiy Island, 2A | 59.938770 N, 30.288802 E  | 25                                   | Akademicheskij Garden                        | 80                               | 2000                               | Flat plain with altitudes below 10 m above the sea level, oak, aspen and linden gardens with presence of ruderal species; Population density - 14288 people per km <sup>2</sup> ; Dominating wind directions – south and south-western, nearest industries – Baltic shipyard; Nearest highways – Bolshoi prospect V.O., Kadetskaya (1 <sup>st</sup> ) line, Universitetskaya embankment (heavy traffic) |
|                 | 15                        | Rumyantsevskaya square, 7          | 59.938469 N, 30.292836 E  | 25                                   | Rumyantsevskiy Garden,                       | 80                               | 2000                               |                                                                                                                                                                                                                                                                                                                                                                                                         |
| Residential     | 16                        | Korablestroitelei street , 19      | 59.945551 N, 30.207853 E  | 25                                   | Residential area on Korablestroitelei street | 100                              | 2800                               | Flat plain with altitudes below 10 m above the sea level, ruderal vegetation; Population density - 14288 people per km <sup>2</sup> ; Dominating wind directions – south and south-western, nearest industries – Baltic shipyard; Nearest highways – Korablestroitelei street., Maliy propect V.O. (heavy traffic).                                                                                     |
|                 | 17                        | Korablestroitelei street , 17      | 59.945304 N, 30.207574 E  | 25                                   | Residential area on Korablestroitelei street | 90                               | 2750                               |                                                                                                                                                                                                                                                                                                                                                                                                         |
|                 | 18                        | Korablestroitelei street , 17A     | 59.944809 N, 30.207574 E  | 25                                   | Residential area on Korablestroitelei street | 90                               | 2700                               |                                                                                                                                                                                                                                                                                                                                                                                                         |
|                 | 19                        | Korablestroitelei street , 17B     | 59.944324 N, 30.207574 E  | 25                                   | Residential area on Korablestroitelei street | 90                               | 2650                               |                                                                                                                                                                                                                                                                                                                                                                                                         |
| Industrial      | 20                        | Detskaya street, 3G                | 59.929719 N, 30.256540 E  | 50                                   | Vicinity of the Baltic shipyard              | 40                               | 200                                | Flat plain with altitudes below 10 m above the sea level, fragmentized ruderal vegetation with low projective cover; Population density - 14288 people per km <sup>2</sup> ; Dominating wind directions – south and south-western, nearest industries – Baltic shipyard; Nearest highways – Bolshoi prospect V.O., Kosaya line, Detskaya street (heavy traffic).                                        |
|                 | 21                        | Kosaya line, 13 / 2GA              | 59.928652 N, 30.256519 E  | 50                                   | Vicinity of the Baltic shipyard              | 50                               | 170                                |                                                                                                                                                                                                                                                                                                                                                                                                         |
|                 | 22                        | Kosaya line, 13 / 6D               | 59.927312 N, 30.255425 E  | 50                                   | Vicinity of the Baltic shipyard              | 40                               | 140                                |                                                                                                                                                                                                                                                                                                                                                                                                         |
|                 | 23                        | Kosaya line, 16 / 1D               | 59.926525 N, 30.255725 E. | 50                                   | Vicinity of the Baltic shipyard              | 40                               | 100                                |                                                                                                                                                                                                                                                                                                                                                                                                         |

| Functional zone | Kirovskiy district |                            |                          |                                      |                                             |                                  |                                    |                                                                                                                                                                                                                                                                                                                                                                                                  |
|-----------------|--------------------|----------------------------|--------------------------|--------------------------------------|---------------------------------------------|----------------------------------|------------------------------------|--------------------------------------------------------------------------------------------------------------------------------------------------------------------------------------------------------------------------------------------------------------------------------------------------------------------------------------------------------------------------------------------------|
|                 | Sampling plot #    | Address                    | GPS                      | Sampling plot square, m <sup>2</sup> | Object of study                             | Proximity to nearest highways, m | Proximity to nearest industries, m | Relief, landscape, vegetation type, population density, nearest industries and highways, traffic, dominating wind directions                                                                                                                                                                                                                                                                     |
| Recreational    | 24                 | Stachek prospect, 20B      | 59.892578 N, 30.274250 E | 25                                   | The park of 9th January                     | 35                               | 340                                | Flat plain with altitudes below 30 m above the sea level, aspen and maple garden with presence of ruderal species; Population density - 7015 people per km <sup>2</sup> ; Dominating wind directions – south and south-western; Nearest industries – Kirovskiy engineering plant; Nearest highways – Stachek prospect, St. Petersburg Ring Road (ZSD), Marshal Jucov's prospect (heavy traffic)  |
|                 | 25                 | Stachek prospect, 17       | 59.893462 N, 30.275216 E | 25                                   | The park of 9th January                     | 35                               | 340                                |                                                                                                                                                                                                                                                                                                                                                                                                  |
|                 | 26                 | Stachek prospect, 15       | 59.894476 N, 30.276224 E | 25                                   | The park of 9th January                     | 35                               | 340                                |                                                                                                                                                                                                                                                                                                                                                                                                  |
|                 | 27                 | Marshal Jukov's street, 34 | 59.890704 N, 30.277410 E | 25                                   | The park of 9th January                     | 50                               | 270                                |                                                                                                                                                                                                                                                                                                                                                                                                  |
| Residential     | 28                 | Korneev street, 4          | 59.885768 N, 30.267835 E | 25                                   | Residential area on Korneev street          | 50                               | 220                                | Flat plain with altitudes below 30 m above the sea level, ruderal vegetation; Population density - 7015 people per km <sup>2</sup> ; Dominating wind directions – south and south-western; Nearest industries – Kirovskiy engineering plant; Nearest highways – Stachek prospect, St. Petersburg Ring Road (ZSD), Marshal Jucov's prospec (heavy traffic)                                        |
|                 | 29                 | Korneev street, 2          | 59.885614 N, 30.268570 E | 25                                   | Residential area on Korneev street          | 50                               | 270                                |                                                                                                                                                                                                                                                                                                                                                                                                  |
|                 | 30                 | Stachek prospect, 44       | 59.886369 N, 30.268543 E | 25                                   | Residential area on Stachek prospect        | 50                               | 350                                |                                                                                                                                                                                                                                                                                                                                                                                                  |
| Industrial      | 31                 | Stachek prospect, 47BT     | 59.885455 N, 30.261639 E | 25                                   | Vicinity of the Kirovskiy engineering plant | 20                               | 50                                 | Flat plain with altitudes below 30 m above the sea level, fragmentized ruderal vegetation with low projective cover; Population density - 7015 people per km <sup>2</sup> ; Dominating wind directions – south and south-western; Nearest industries – Kirovskiy engineering plant; Nearest highways – Stachek prospect, St. Petersburg Ring Road (ZSD), Marshal Jucov's prospec (heavy traffic) |
|                 | 32                 | Stachek prospect, 47BP     | 59.885191 N, 30.262487 E | 25                                   | Vicinity of the Kirovskiy engineering plant | 20                               | 50                                 |                                                                                                                                                                                                                                                                                                                                                                                                  |
|                 | 33                 | Stachek prospect, 47BP     | 59.884911 N, 30.263517 E | 25                                   | Vicinity of the Kirovskiy engineering plant | 20                               | 50                                 |                                                                                                                                                                                                                                                                                                                                                                                                  |
|                 | 34                 | Stachek prospect, 47BP     | 59.884603 N, 30.264697 E | 25                                   | Vicinity of the Kirovskiy engineering plant | 20                               | 50                                 |                                                                                                                                                                                                                                                                                                                                                                                                  |
