# Supplementary material for: Polycyclic aromatic hydrocarbon in urban soils of an Eastern European megalopolis: distribution, source identification and cancer risk evaluation
Source: Copernicus journal article supplement (doi:10.5194/se-9-669-2018), 2018-05-23
Supplement: Supplementary file 1 [file se-9-669-2018-supplement.zip › Supplementary/Table-S1-2.pdf]

# Polycyclic aromatic hydrocarbon in urban soils of the Eastern European megalopolis: distribution, source identification and cancer risk evaluation

Shamilishvily G<sup>1</sup>, Abakumov E<sup>1</sup>, Gabov D<sup>2</sup>

<sup>1</sup>St. Petersburg State University, Dept. of Applied Ecology, St. Petersburg, Russia

<sup>2</sup>Komi Biological Institute of the Russian Academy of Sciences, Syktyvkar, Russia e-

mail: [george199207@gmail.com](mailto:george199207@gmail.com)

**Table S1.** Soil guideline values for PAHs established in some countries, mg·kg<sup>-1</sup>

|        | Acenaphthene                                                                                                           | Acenaphthylene | Anthracene | Benz(a)anthracene | Benzo(a)pyrene  | Benzo(b)fluoranthene | Benzo(ghi)perylene | Chrysene        | Dibenz(ah)anthracene | Fluoranthene | Fluorene | Indeno(123-cd)pyrene | Naphthalene      | Phenanthrene | Pyrene            | PAH (total) |
|--------|------------------------------------------------------------------------------------------------------------------------|----------------|------------|-------------------|-----------------|----------------------|--------------------|-----------------|----------------------|--------------|----------|----------------------|------------------|--------------|-------------------|-------------|
| CCME   | <b>Residential / Parkland</b>                                                                                          |                |            |                   |                 |                      |                    |                 |                      |              |          |                      |                  |              |                   |             |
|        |                                                                                                                        |                |            | 1                 | 0.7             | 1                    |                    |                 | 1                    |              |          | 1                    | 0.6              | 5            | 10                |             |
|        | <b>Industrial / Commercial</b>                                                                                         |                |            |                   |                 |                      |                    |                 |                      |              |          |                      |                  |              |                   |             |
|        |                                                                                                                        |                |            | 10                | 0.7             | 10                   |                    |                 | 10                   |              |          | 10                   | 22               | 50           | 100               |             |
| US EPA | <b>Agricultural</b>                                                                                                    |                |            |                   |                 |                      |                    |                 |                      |              |          |                      |                  |              |                   |             |
|        |                                                                                                                        |                |            | 0.1               | 0.1             | 0.1                  |                    |                 | 0.1                  |              |          | 0.1                  | 0.1              | 0.1          | 0.1               |             |
|        | <b>Residential (combined exposure)</b>                                                                                 |                |            |                   |                 |                      |                    |                 |                      |              |          |                      |                  |              |                   |             |
|        | 3,700                                                                                                                  |                | 22,000     | 0.62              | 0.062           | 0.62                 |                    | 62              | 0.062                | 2,300        | 2,700    | 0.62                 | 56               |              | 2,300             |             |
| NZMfE  | <b>Industrial (combined exposure)</b>                                                                                  |                |            |                   |                 |                      |                    |                 |                      |              |          |                      |                  |              |                   |             |
|        | 29,000                                                                                                                 |                | 240,000    | 2.1               | 0.21            | 2.1                  |                    | 211             | 0.21                 | 22,000       | 26,000   | 2.1                  | 190              |              | 29,000            |             |
|        | <b>Residential (calculated mean values for all soil types at 0-1 m depth)</b>                                          |                |            |                   |                 |                      |                    |                 |                      |              |          |                      |                  |              |                   |             |
|        |                                                                                                                        |                |            | 0.27              | 0.27            | 0.27                 |                    | 0.27            | 0.27                 |              |          | 0.27                 | 64               |              | 1600 <sup>a</sup> |             |
| DME    | <b>Industrial / Commercial (calculated mean values for all soil types at 0-1 m depth)</b>                              |                |            |                   |                 |                      |                    |                 |                      |              |          |                      |                  |              |                   |             |
|        |                                                                                                                        |                |            | 11 <sup>a</sup>   | 11 <sup>a</sup> | 11 <sup>a</sup>      |                    | 11 <sup>a</sup> | 11 <sup>a</sup>      |              |          | 11 <sup>a</sup>      | 143 <sup>a</sup> |              |                   |             |
|        | <b>Agricultural (calculated mean values for all soil types at 0-1 m depth)</b>                                         |                |            |                   |                 |                      |                    |                 |                      |              |          |                      |                  |              |                   |             |
|        |                                                                                                                        |                |            | 0.027             | 0.027           | 0.027                |                    | 0.027           | 0.027                |              |          | 0.027                | 7.2              |              | 160 <sup>a</sup>  |             |
| NL     | <b>Soil Quality Criteria (Human Health Risk)</b>                                                                       |                |            |                   |                 |                      |                    |                 |                      |              |          |                      |                  |              |                   |             |
|        |                                                                                                                        |                |            |                   | 0.1             |                      |                    |                 | 0.1                  |              |          |                      |                  |              |                   | 1.5         |
|        | <b>Soil Quality Criteria (Ecological Risk)</b>                                                                         |                |            |                   |                 |                      |                    |                 |                      |              |          |                      |                  |              |                   |             |
| FME    |                                                                                                                        |                |            |                   | 0.1             |                      |                    |                 |                      |              |          |                      |                  |              |                   | 1           |
|        | <b>Maximum Permissible Concentrations (MPCs) for PAHs (from Kalf et al., 1997)</b>                                     |                |            |                   |                 |                      |                    |                 |                      |              |          |                      |                  |              |                   |             |
|        |                                                                                                                        |                | 0.12       | 0.25              | 0.26            |                      | 7.5                | 10.7            |                      | 2.6          |          | 5.9                  | 0.14             | 0.51         |                   |             |
| GFME   | <b>Threshold value</b>                                                                                                 |                |            |                   |                 |                      |                    |                 |                      |              |          |                      |                  |              |                   |             |
|        | 1                                                                                                                      |                |            | 1                 | 0.2             | 1                    |                    |                 |                      | 1            |          |                      | 1                | 1            |                   | 15          |
|        | <b>Lower guideline value</b>                                                                                           |                |            |                   |                 |                      |                    |                 |                      |              |          |                      |                  |              |                   |             |
|        | 5 (e)                                                                                                                  |                |            | 5 (e)             | 2 (t)           | 5 (e)                |                    |                 |                      | 5 (e)        |          |                      | 5 (e)            | 5 (e)        |                   | 30 (e)      |
|        | <b>Higher guideline value</b>                                                                                          |                |            |                   |                 |                      |                    |                 |                      |              |          |                      |                  |              |                   |             |
| RF     | 15 (e)                                                                                                                 |                |            | 15 (e)            | 15 (e)          | 15 (e)               |                    |                 |                      | 15 (e)       |          |                      | 15 (e)           | 15 (e)       |                   | 100 (e)     |
|        | <b>Precautionary soil threshold values of organic pollutants / Soil organic matter (SOM) &gt; 8 % (BBodSchV, 1999)</b> |                |            |                   |                 |                      |                    |                 |                      |              |          |                      |                  |              |                   |             |
|        |                                                                                                                        |                |            |                   | 1               |                      |                    |                 |                      |              |          |                      |                  |              |                   | 10          |
|        | <b>Precautionary soil threshold values of organic pollutants / Soil organic matter (SOM) ≤ 8 %</b>                     |                |            |                   |                 |                      |                    |                 |                      |              |          |                      |                  |              |                   |             |
| RF     |                                                                                                                        |                |            |                   | 0.3             |                      |                    |                 |                      |              |          |                      |                  |              |                   | 3           |
|        | <b>Maximum Permissible Concentrations (MPCs)</b>                                                                       |                |            |                   |                 |                      |                    |                 |                      |              |          |                      |                  |              |                   |             |
| RF     |                                                                                                                        |                |            |                   | 0.02            |                      |                    |                 |                      |              |          |                      |                  |              |                   |             |
|        |                                                                                                                        |                |            |                   |                 |                      |                    |                 |                      |              |          |                      |                  |              |                   |             |

CCME – Canadian Council of Ministers of the Environment; US EPA – United States Environmental Protection Agency; NZMfE – Ministry for the Environment of New Zealand; DME – Danish Ministry of the Environment; NL – Netherlands Ministry of Infrastructure and Environment; FME – Finnish Ministry of the Environment; GFME – German Federal Ministry for the Environment; RF – Ministry of Natural Resources and Environment of the Russian Federation. <sup>a</sup> – marked values are likely correspond to concentrations associated with formation of a residual separate phase. (e) – calculations are based on ecological risk. (t) – calculations are based on health risk.

**Polycyclic aromatic hydrocarbon in urban soils of the Eastern European megalopolis: distribution, source identification and cancer risk evaluation**

**Shamilishvily G<sup>1</sup>, Abakumov E<sup>1</sup>, Gabov D<sup>2</sup>**

<sup>1</sup>*St. Petersburg State University, Dept. of Applied Ecology, St. Petersburg, Russia* <sup>2</sup>*Komi Biological Institute of the Russian Academy of Sciences, Syktyvkar, Russia* e-mail: [george199207@gmail.com](mailto:george199207@gmail.com)

**Table S2.** PAH molecular ratios with end member values

| Molecular ratio                | Value range | PAH origin                                                        | Reference            |
|--------------------------------|-------------|-------------------------------------------------------------------|----------------------|
| ANT/(ANT+PHE)                  | <0.10       | Petroleum/petrogenic source                                       | Yunker et al. (2002) |
|                                | >0.10       | Combustion                                                        |                      |
| FLT/(FLT+PYR)                  | <0.40       | Petroleum/petrogenic source                                       | Yunker et al. (2002) |
|                                | 0.40-0.50   | Gasoline, diesel and crude oil combustion, cars and diesel trucks |                      |
|                                | >0.50       | Grass, coal and wood combustion                                   |                      |
| BaA/(BaA+CHR)                  | <0.20       | Petroleum/petrogenic source                                       | Yunker et al. (2002) |
|                                | 0.20-0.35   | Petroleum/petrogenic source or combustion                         |                      |
|                                | 0.35-0.50   | Combustion                                                        |                      |
|                                | >0.50       | Grass, coal and wood combustion                                   |                      |
| IPY/(IPY+BPE)                  | <0.20       | Petroleum/petrogenic source                                       | Yunker et al. (2002) |
|                                | 0.20-0.50   | Liquid fossil fuel (vehicle and crude oil) combustion             |                      |
|                                | >0.50       | Grass, wood and coal combustion                                   |                      |
| BaP/BPE                        | <0.60       | Non-traffic sources                                               | Pandey et al. (1999) |
|                                | >0.60       | Traffic sources                                                   |                      |
| CombPAH <sup>a</sup> /<br>ΣPAH | <0.30       | Petroleum/petrogenic source                                       | Hwang et al. (2003)  |
|                                | 0.30-0.70   | Petroleum/petrogenic source or combustion                         |                      |
|                                | >0.70       | Combustion dominated source                                       |                      |

<sup>a</sup>CombPAH – combustion PAH = sum of FLT, PYR, BaA, CHR, BbF, BkF, BaP, IPY and BPE
